# Supplementary material
Source: MDPI journal article supplement (https://www.mdpi.com/2072-4292/13/4/672)
Supplement: s1 [file s1]

Archive with 6 entries (6 files):
- Table S1. Roads_relevant on-site GPR surveys.pdf
- Table S2. Airports_ relevant on-site GPR surveys.pdf
- Table S3. Railways_relevant on-site GPR surveys.pdf
- Table S4. Retaining walls_relevant on-site GPR surveys.pdf
- Table S5. Bridges_relevant on-site GPR surveys.pdf
- Table S6. Tunnelling_relevant on-site GPR surveys.pdf
