# Supplementary material
Source: MDPI journal article supplement (https://www.mdpi.com/2072-4292/13/4/672)
Supplement: s1 [file s1 › Table S2. Airports_ relevant on-site GPR surveys.pdf]

| GPR Application                                                                                                                                                                                                                                                               | Methodology                                                   |                                                                                                                     |                                                                                                       | Processing                                                                                                                                         |                                                                         | Results                                                                                                                                                                                                                                                                                                                                                                                                                                                    |                         | Complementary Tests (NDT, coring, etc.) | Ref. |
|-------------------------------------------------------------------------------------------------------------------------------------------------------------------------------------------------------------------------------------------------------------------------------|---------------------------------------------------------------|---------------------------------------------------------------------------------------------------------------------|-------------------------------------------------------------------------------------------------------|----------------------------------------------------------------------------------------------------------------------------------------------------|-------------------------------------------------------------------------|------------------------------------------------------------------------------------------------------------------------------------------------------------------------------------------------------------------------------------------------------------------------------------------------------------------------------------------------------------------------------------------------------------------------------------------------------------|-------------------------|-----------------------------------------|------|
|                                                                                                                                                                                                                                                                               | Antennas & Acquisition parameters                             | Testing Set-up                                                                                                      | Equipment                                                                                             | Filters & Algorithms                                                                                                                               | Software                                                                | Achievements                                                                                                                                                                                                                                                                                                                                                                                                                                               | Inconveniences & Limits |                                         |      |
| <p>[Damage in airport runway]</p> <p>Development of an algorithm that allows determining the existence of damage due to cracks and voids, automatically classifying them and recognizing the anomalies associated with the damage and those that are not caused by damage</p> | 900 MHz antenna                                               | NP                                                                                                                  | NP                                                                                                    | <p>Pre-processing: mean method to suppress background clutter</p> <p>Processing: Hough transform</p> <p>The analysis is done using the A-scans</p> | <p>Pre-processing NP</p> <p>Processing with the developed algorithm</p> | (i) The algorithm can classify damage due to cracks and voids; (ii) small calculation quantity; (iii) reliable recognition results                                                                                                                                                                                                                                                                                                                         | NP                      | Computational simulation                | [76] |
| <p>[Airfield pavements assessment]</p> <p>Examples of GPR applications in airfields pavement assessment</p>                                                                                                                                                                   | <p>Pulse 2.2 GHz antenna</p> <p>3D step frequency antenna</p> | <p>The antennas are mounted on a vehicle</p> <p>The step frequency antenna are 15 pairs of transceiver antennas</p> | <p>GSSI (2.2 GHz antenna)</p> <p>3D Radar AS (step frequency antenna)</p> <p>Position using a GPS</p> | NP                                                                                                                                                 | NP                                                                      | (i) Detecting early signs of potential damage of the structure and Subgrade; (ii) measurement of a thickness of individual layers of construction and the entire pavement; (iii) the layered structure of asphalt packages is well visualized on echograms; (iv) horizons between the upper and the lower layer are distinguishable, particularly at the border between new and old layers; (v) mesh reinforcement is easily identified between the layers | NP                      | NP                                      | [77] |

|                                                                                                                                                                                          |                                                                                                      |                                                 |                                                                                          |                                                                                                                                           |               |                                                                                                                                                                                                                                                                                                                                                                                                                                                                                                                                            |                                                                                                                                                                                                                                                                                                                                                                          |                                                                                                                             |      |
|------------------------------------------------------------------------------------------------------------------------------------------------------------------------------------------|------------------------------------------------------------------------------------------------------|-------------------------------------------------|------------------------------------------------------------------------------------------|-------------------------------------------------------------------------------------------------------------------------------------------|---------------|--------------------------------------------------------------------------------------------------------------------------------------------------------------------------------------------------------------------------------------------------------------------------------------------------------------------------------------------------------------------------------------------------------------------------------------------------------------------------------------------------------------------------------------------|--------------------------------------------------------------------------------------------------------------------------------------------------------------------------------------------------------------------------------------------------------------------------------------------------------------------------------------------------------------------------|-----------------------------------------------------------------------------------------------------------------------------|------|
| <p>[Grouting under pavement]</p> <p>Case study of the assessment of grouting under a rigid airport pavement. GPR is used to detect the possible voids under the slab before grouting</p> | 1 GHz shielded antenna (time window 12 ns)                                                           | Grid of radar lines spaced 45 cm                | RAMAC (MALA Geoscience)                                                                  | NP                                                                                                                                        | Ground-vision | (i) To examine the grouting effectiveness, the GPR surveying results after grouting are compared with GPR images before grouting along the same line; (ii) GPR and FWD used to verify the restoration with grouting                                                                                                                                                                                                                                                                                                                        | NP                                                                                                                                                                                                                                                                                                                                                                       | FWD                                                                                                                         | [78] |
| <p>[Damage in airport pavements]</p> <p>novel method to inspect partially damaged pavement when the thin cracks are difficult to detect using the reflected GPR signals</p>              | <p>8-channel transmitter and receiver antennas</p> <p>Frequency range: 50MHz - 1.5GHz</p> <p>CMP</p> | Radar lines along the top of the wall           | Multi-static GPR system "Yakumo" (developed in the Tohoku University). Stepped-frequency | <p>Wave velocity obtained from CMP data combined with an interferometric method</p> <p>Evaluating deviation in the depth and velocity</p> | NP            | (i) Thin cracks filled with water and air produce inhomogeneity in the asphalt layer, and the RMS velocity of signals traveling through the layer at these inhomogeneity differs slightly from that in the undamaged asphalt; (ii) slight deviations in permittivity in the damaged zones; (iii) the special antenna arrangement of the Yakumo system makes it possible to simultaneously acquire several CMP datasets along a survey line; (iv) the proposed method is more accurate than the conventional CMP velocity estimation method | (i) error caused by the distortion of the wavelets by small sources of scatter and by the choice of reference point; (ii) in field applications of this method, the estimated deviations in the velocity and thickness should be considered as an indication of the distribution of inhomogeneity within the inspected asphalt layers and not as exact numerical results | <p>Coring</p> <p>FDTD simulation using ray tracing, convoluted with a Ricker wavelet with a center frequency of 500 MHz</p> | [81] |
| Case study: evaluation of the structure of the rigid pavement of                                                                                                                         | 250 MHz shielded antenna                                                                             | 6 radar lines (total surveyed distance: 1432 m) | Detector Duo (IDS)                                                                       | NP                                                                                                                                        | ReflexW       | (i) Thickness of the pavement layers; (ii) shallow geology under the pavement (sand and embankment)                                                                                                                                                                                                                                                                                                                                                                                                                                        | NP                                                                                                                                                                                                                                                                                                                                                                       | Borehole                                                                                                                    | [82] |

|                                                                                                                                                                                                                                                                                   |                                                                                                                                                                       |                                                                                                                                                        |                                                                       |                                                                                                                             |                                         |                                                                                                                                                                                                                                                                                                                   |                                                                            |                                   |      |
|-----------------------------------------------------------------------------------------------------------------------------------------------------------------------------------------------------------------------------------------------------------------------------------|-----------------------------------------------------------------------------------------------------------------------------------------------------------------------|--------------------------------------------------------------------------------------------------------------------------------------------------------|-----------------------------------------------------------------------|-----------------------------------------------------------------------------------------------------------------------------|-----------------------------------------|-------------------------------------------------------------------------------------------------------------------------------------------------------------------------------------------------------------------------------------------------------------------------------------------------------------------|----------------------------------------------------------------------------|-----------------------------------|------|
| Santos Dumont Airport in Rio de Janeiro, Brazil                                                                                                                                                                                                                                   | 700 MHz shielded antenna<br><br>Time window: 64 ns                                                                                                                    | Spacing traces: 2 cm<br><br>256 samples per trace                                                                                                      |                                                                       |                                                                                                                             |                                         |                                                                                                                                                                                                                                                                                                                   |                                                                            |                                   |      |
| Two case study: a) stratigraphic information up to 2 m depth; recognize possible failures or subsidence structures; detect lateral variations of the geotechnical properties (Test 1). b) Verify the thickness of new constructed FRC (Fiber Reinforced Concrete) plates (Test 2) | 500 MHz shielded antenna (Test 1) (Time window: 60 ns)<br><br>800 MHz shielded antenna (Test 2)<br><br>1600 MHz shielded antenna (Tests 1 and 2) (Time window: 12 ns) | Use and test of a tow designed by an spin-off of the University of Trieste (the device can reach velocities between 50-60 km/h during data acquisition | Malå ProEx GPR<br><br>RTK mode GPS with centimetric precision         | background removal; high-pass filtering; true amplitude recovery; depth conversion                                          |                                         | (i) Test 1: the interpretation of inhomogeneity of the subgrade let to locate the critical failure points and drive for future maintenance activities; (ii) Test 2: Verification of the layers thicknesses                                                                                                        | (i) Improvement of precision and speed in picking the horizons is required | Cores                             | [83] |
| Test in the Tokyo International airport in the taxiway. Method to analyze the trend of the maximum amplitude of the lateral wave with the offset in CMP gathers after                                                                                                             | Stepped-frequency antennas in a range from 50 MHz to 1.5 GH (8 pairs of bowtie antennas)                                                                              | Survey interval: 1 trace per cm<br><br>Samples per trace: 256<br><br>Scan velocity: 7 km/h                                                             | Multi-static ground penetrating radar system developed by the authors | Variation of the maximum amplitude value is estimated as a linear function of the antenna offset by the least square method | CST Studio Suite (numerical simulation) | (i) Novel method consisting of characterizing the properties of the lateral wave in the CMP gathers acquired by a multi-static GPR system to detect interlayer debonding; (ii) the lateral wave is very sensitive to material properties; (iii) the results are consistent with the conventional acoustic finding | NP                                                                         | Cores<br><br>Numerical simulation | [85] |

|                                                                                                                                  |                                                |                                                                     |                           |                                                                                                                                                                                                                                                                         |         |                                                                                                                                                                                                                                |                                                                                                                                |                                          |      |
|----------------------------------------------------------------------------------------------------------------------------------|------------------------------------------------|---------------------------------------------------------------------|---------------------------|-------------------------------------------------------------------------------------------------------------------------------------------------------------------------------------------------------------------------------------------------------------------------|---------|--------------------------------------------------------------------------------------------------------------------------------------------------------------------------------------------------------------------------------|--------------------------------------------------------------------------------------------------------------------------------|------------------------------------------|------|
| amplitude compensation for detecting interlayer debonding of the upper asphalt layer                                             |                                                | Data acquired using common offset and CMP                           |                           |                                                                                                                                                                                                                                                                         |         | method and with cores; (iv) Efficient data acquisition                                                                                                                                                                         |                                                                                                                                |                                          |      |
| Assessing with GPR filled layers, including the runway, aprons and taxiway of the new sea-filled airport OGU (Black sea, Turkey) | 100 MHz shielded antenna (time window: 400 ns) | 6 radar lines<br><br>Distance between traces: 0.05 m                | RAMAC CUII GPR            | Time-zero correction; dewow; background removal; gain (amplitude decay); band-pass Butterworth filter, deconvolution (autocorrelation; 14 ns, filter length: 150 ns), velocity analysis (matching hyperbolas), F-K filter, Kirchhoff migration, topographic corrections | ReflexW | (i) Detection of the bottom depth line of the filling; (ii) the proper selection of the filter length in deconvolution improves the signal-to-noise ratio in B-scans; (iii) determination of bathymetric depth                 | (i) Data had too much diffraction and multiple reflections that obscured the real depth of the filled layer along the profile  | Topographic measurements<br><br>Drilling | [86] |
| GPR survey to study the frozen surface beneath the airfield in the Kangerlussuaq Airport                                         | (time window: 150 ns)                          | 11 radar lines<br><br>50 traces per m<br><br>Samples per trace: 512 | GPR model SIR-2000 (GSSI) | Band-pass filter (175 MHz - 700 MHz); spatial filter; running average                                                                                                                                                                                                   | ReflexW | (i) Clear connection between the areas with white-painted asphalt and a reduced depth to the permafrost surface; (ii) detection of the permafrost surface showing variations related to ground materials and the asphalt color | (i) Measurements during all the year are needed in order to determine whether the entire active layer freezes in winter or not | Borehole<br><br>Trench                   | [87] |

Table S2. Airports: relevant on-site GPR surveys (NP = Not Provided; Ref. = Reference).
