# Supplementary material
Source: MDPI journal article supplement (https://www.mdpi.com/2072-4292/13/4/672)
Supplement: s1 [file s1 › Table S3. Railways_relevant on-site GPR surveys.pdf]

| GPR Application                                                                             | Methodology                                                             |                                                                                                                                                                                            |                   | Processing                                               |                                                                                | Results                                                                                                                                                              |                                                                                                                                                                                                                                                                                     | Complementary Tests (NDT, coring, etc.)                     | Ref. |
|---------------------------------------------------------------------------------------------|-------------------------------------------------------------------------|--------------------------------------------------------------------------------------------------------------------------------------------------------------------------------------------|-------------------|----------------------------------------------------------|--------------------------------------------------------------------------------|----------------------------------------------------------------------------------------------------------------------------------------------------------------------|-------------------------------------------------------------------------------------------------------------------------------------------------------------------------------------------------------------------------------------------------------------------------------------|-------------------------------------------------------------|------|
|                                                                                             | Antennas & Acquisition parameters                                       | Testing Set-up                                                                                                                                                                             | Equipment         | Filters & Algorithms                                     | Software                                                                       | Achievements                                                                                                                                                         | Inconveniences & Limits                                                                                                                                                                                                                                                             |                                                             |      |
| a) Ballasted track                                                                          |                                                                         |                                                                                                                                                                                            |                   |                                                          |                                                                                |                                                                                                                                                                      |                                                                                                                                                                                                                                                                                     |                                                             |      |
| Railway monitoring, ballast thickness index, ballast fouling index, the fouling depth layer | Horn antennas 2 GHz (3 antennas) and 400 MHz ground-coupled (1 antenna) | 4 longitudinal profile lines, one per each antenna, 2 x 2 GHz antennas on the shoulders and 1 x 2 GHz and 1x 400 MHz antennas in the centre, between rails. Maximum test speed of 128 km/h | NP                | NP                                                       | Dedicated software, not specified                                              | (i) Ballast layer thickness with 400MHz antenna; (ii) ballast fouling with 2 GHz antennas; (iii) strong relationship between fouling index (FI) and moisture content | (i) Noise at shoulder antennas, shoulder antenna difficulties over concrete ties but function properly over wood ties; (ii) estimated Ballast Fouling Index values were generally larger in the track centre than the measured FI from physical sampling and lower in the shoulders | Dynamic Cone Penetrometer Test (DCP) and Geo-Endoscopy Test | [90] |
| Detection of railways embankments and ballast layer continuity                              | Horn antennas 400 MHz (4 antennas) and 1 GHz (1 antenna)                | 4 parallel longitudinal profile lines, one per each antenna                                                                                                                                | GSSI model SIR-20 | NP                                                       | GeoExplorer, Geo Inspector and Geo Analyzer – specified software was developed | (i) Embankment structural defects, irregularities; (ii) ballast layer discontinuities                                                                                | (i) Display of 3 profile lines                                                                                                                                                                                                                                                      | NP                                                          | [91] |
| Development of a system dedicated to railway assessment                                     | Ground coupled antennas: five 600 MHz; two 200 MHz and one 1.6 GHz      | Longitudinal profile lines, one per each antenna, between the rails and on shoulders. Test speed up to 80 km/h                                                                             | IDS GeoRadar      | Time-zero correction; FIR; IIR; Gain; Background Removal | Adapted to allow survey of more than 20 km/h                                   | (i) Ballast and subballast layers thickness; (ii) subballast defects; (iii) moist areas                                                                              | NP                                                                                                                                                                                                                                                                                  | NP                                                          | [92] |

|                                                                                                                                          |                                                                                                                        |                                                                                                                                                 |                               |                                                |                                                   |                                                                                                                                                  |                                                   |    |               |
|------------------------------------------------------------------------------------------------------------------------------------------|------------------------------------------------------------------------------------------------------------------------|-------------------------------------------------------------------------------------------------------------------------------------------------|-------------------------------|------------------------------------------------|---------------------------------------------------|--------------------------------------------------------------------------------------------------------------------------------------------------|---------------------------------------------------|----|---------------|
| Thickness of clean ballast, detect the trapped water and assess the ballast fouling and moisture content                                 | 1 and 2 GHz horn antennas (4 antennas)                                                                                 | Longitudinal profile lines, one per each antenna, between the rails and on shoulders (at least 60 cm from rails) maximum test speed of 128 km/h | Two GSSI SIR-20 control units | STFT, time frequency                           | NP                                                | (i) Ballast thickness; (ii) ballast fouling; (iii) trapped water; (iv) moisture content                                                          | NP                                                | NP | [93]<br>[101] |
| Layer thickness                                                                                                                          | 400 MHz (ground-coupled) antenna<br>1 GHz (horn air-coupled) antenna                                                   | Longitudinal profile lines.<br>GPS                                                                                                              | GSSI                          | NP                                             | Railway Doctor                                    | (i) Ballast and subballast thickness                                                                                                             | NP                                                | NP | [96]          |
| Ballast fouling                                                                                                                          | Two 400 MHz antenna                                                                                                    | Longitudinal profile lines.<br>GPS                                                                                                              | GSSI SIR-20                   | NP                                             | Railway Doctor                                    | (i) Ballast fouling                                                                                                                              | NP                                                | NP | [100]         |
| Ballast fouling                                                                                                                          | 500 MHz, 900 MHz, 1.0 GHz, 1.6 GHz and 2.6 GHz                                                                         | Longitudinal profile lines.<br>Perpendicular and parallel orientation of antennas                                                               | NP                            | NP                                             | NP                                                | (i) Fouling Indices (FI). The 500 MHz antenna in the parallel orientation gave the best correlation (0.92) between fouling index and scan area   | NP                                                | NP | [103]         |
| Ballast fouling, mud spot locations                                                                                                      | 2 GHz horn antennas                                                                                                    | Longitudinal profile lines                                                                                                                      | NP                            | NP                                             | NP                                                | (i) Ballast fouling versus clean ballast                                                                                                         | (i) Mud spot location not detected                | NP | [104]         |
| Influence of fragmentation and fouling of ballast on the GPR signal; humidity detection; the most suitable antennas survey configuration | 1 GHz (Horn antenna):<br>4 scans per meter;<br>25 ns time window<br><br>2 GHz (Horn antenna): 4 scans per meter; 15 ns | Longitudinal profile lines, 0°, 45°, 90° antenna orientation                                                                                    | IDS<br>GeoRadar               | Dewow; background removal; band-pass filtering | NP<br>Time and frequency domain signal processing | (i) Influence of the antenna orientation (45° is the best); (ii) ballast fragmentation (2 GHz); (iii) fouling index and moisture content (1 GHz) | (i) Lower sensitivity for lower frequency antenna | NP | [106]         |

| b) Substructure / Embankment                                         |                                                                 |                                          |                                                                  |                                                                                                                                                                                                                                                                                                               |    |                                                                                                                       |    |                            |               |
|----------------------------------------------------------------------|-----------------------------------------------------------------|------------------------------------------|------------------------------------------------------------------|---------------------------------------------------------------------------------------------------------------------------------------------------------------------------------------------------------------------------------------------------------------------------------------------------------------|----|-----------------------------------------------------------------------------------------------------------------------|----|----------------------------|---------------|
| Substructure assessment, dielectric constants and moisture detection | 400 MHz (512 samples/scan)                                      | Longitudinal profile lines               | GeoScan-32                                                       | NP                                                                                                                                                                                                                                                                                                            | NP | (i) Ballast thickness; (ii) dielectric constants of subballast; (iii) moisture determination                          | NP | NP                         | [94]          |
| Substructure settlements detection                                   | 400 MHz                                                         | Longitudinal profile line between rails  | IDS GeoRadar                                                     | NP                                                                                                                                                                                                                                                                                                            | NP | (i) Settlements at substructure level                                                                                 | NP | Track geometric parameters | [95]<br>[102] |
| Permafrost detection                                                 | 100 MHz, 200 MHz and 400 MHz (1024 samples/scan)                | Longitudinal profiles                    | GR-III                                                           | Directly low- and high-pass filtered, and post-processing consisted only of i) block average smoothing; ii) down-sampling the traces to 1024 samples using linear interpolation (to avoid on-screen display aliasing); iii) two-fold stacking; iv) applying a linear time-varying gain; v) background removal | NP | (i) Detection and mapping of buried ice as well as for revealing structures; (ii) the make-up of permafrost sediments | NP | NP                         | [98]          |
| Substructures' assessment, layer thickness                           | Ground-coupled antennas: 400 MHz, 800 MHz, 900 MHz, and 1.6 GHz | Longitudinal e transversal profile lines | MALA Geoscience, Inc. RAMAC system<br><br>GSSI, SIR 10 (900 MHz) | NP                                                                                                                                                                                                                                                                                                            | NP | (i) Subballast layer thickness, (ii) moisture detection                                                               | NP | NP                         | [105]         |

| c) Ballastless track                                                                                    |                              |    |    |    |    |                                                     |                                               |                                         |       |
|---------------------------------------------------------------------------------------------------------|------------------------------|----|----|----|----|-----------------------------------------------------|-----------------------------------------------|-----------------------------------------|-------|
| Detection of bonding condition between sleeper and slab, location of voids, layer thickness measurement | 900 MHz and 1.5 GHz antennas | NP | NP | NP | NP | (i) Crack at layer interface; (ii) re-bars location | (i) No information on weak debonding detected | Impact-Echo Method (IEM) and Ultrasonic | [112] |
| Mud pumping at subgrade                                                                                 | NP                           | NP | NP | NP | NP | NP                                                  | NP                                            | Impact-Echo Method (IEM)                | [113] |

Table S3. Railways: relevant on-site GPR surveys (NP = Not Provided; Ref. = Reference).
