# Supplementary material
Source: MDPI journal article supplement (https://www.mdpi.com/2072-4292/13/4/672)
Supplement: s1 [file s1 › Table S4. Retaining walls_relevant on-site GPR surveys.pdf]

| GPR Application                                                                                                                                                                  | Methodology                                                                                                                                                                                                                                                                                                                                                                                                               |                                                                                                                                                                                                                                                                                                                                    |                                                                                                 | Processing                                                                                                                                                                                                                                                                                                                                                                                                                                                                                                                                                                                                                                                                                                         |                              | Results                                                                                                                                                                                                                                                                                                                                                                                                                                         |                                                                                                                                                                                                                                                                                                                                                                                       | Complementary Tests (NDT, coring, etc.) | Ref.  |
|----------------------------------------------------------------------------------------------------------------------------------------------------------------------------------|---------------------------------------------------------------------------------------------------------------------------------------------------------------------------------------------------------------------------------------------------------------------------------------------------------------------------------------------------------------------------------------------------------------------------|------------------------------------------------------------------------------------------------------------------------------------------------------------------------------------------------------------------------------------------------------------------------------------------------------------------------------------|-------------------------------------------------------------------------------------------------|--------------------------------------------------------------------------------------------------------------------------------------------------------------------------------------------------------------------------------------------------------------------------------------------------------------------------------------------------------------------------------------------------------------------------------------------------------------------------------------------------------------------------------------------------------------------------------------------------------------------------------------------------------------------------------------------------------------------|------------------------------|-------------------------------------------------------------------------------------------------------------------------------------------------------------------------------------------------------------------------------------------------------------------------------------------------------------------------------------------------------------------------------------------------------------------------------------------------|---------------------------------------------------------------------------------------------------------------------------------------------------------------------------------------------------------------------------------------------------------------------------------------------------------------------------------------------------------------------------------------|-----------------------------------------|-------|
|                                                                                                                                                                                  | Antennas & Acquisition parameters                                                                                                                                                                                                                                                                                                                                                                                         | Testing Set-up                                                                                                                                                                                                                                                                                                                     | Equipment                                                                                       | Filters & Algorithms                                                                                                                                                                                                                                                                                                                                                                                                                                                                                                                                                                                                                                                                                               | Software                     | Achievements                                                                                                                                                                                                                                                                                                                                                                                                                                    | Inconveniences & Limits                                                                                                                                                                                                                                                                                                                                                               |                                         |       |
| <p>[Concrete retaining walls in roads]</p> <p>Description of data processing, use of a device developed to acquire data in walls and processing strategies. Two case studies</p> | <p>Case study: large retaining wall in a motorway:</p> <p>400 MHz: 40 ns time length &amp; 512 samples per scan</p> <p>900 MHz: 25 ns time length &amp; 512 samples per scan</p> <p>1.5 GHz: 30 ns time length &amp; 1024 samples per scan</p> <p>Case study: test in a small retaining wall: two perpendicular 1.5 GHz antennas (distance between centres 0.197 m) with a time length 15 ns and 512 samples per scan</p> | <p>Study of a large motorway wall: 0.1 m line spacing with 900 MHz and 400 MHz antennas, and 0.005 m line spacing with 1.5 GHz antenna</p> <p>Study of a small retaining wall: testing strategies for the reduction of the polarization dependence of GPR results using two perpendicular antennas, with a 0.01 m line spacing</p> | <p>GSSI and a semiautomatic survey apparatus for GPR acquisition in vertical lines on walls</p> | <p>1.5 GHz: Band-pass filter (lower cut-off 200 MHz, lower plateau 400 MHz, upper plateau 2700 MHz, upper cut-off 2900 MHz); Static correction of picked direct wave; Kirchhoff migration (<math>v=0.11\text{m/ns}</math>); Gain (linear function: 0 dB at 0 ns and 20 dB at 20 ns); Time cut to 12 ns; Resampling to 0.04 ns; Background Removal (3D was built using 2D datasets with and without Background Removal); 3D images</p> <p>Other antenna: NP</p> <p>Test in the small wall: Time shift; Dewow; Linear gain (0 dB at 0 ns and 20 dB at 15 ns); Background removal; Spiking deconvolution; F-K filter; Built 3D images; 3D deconvolution with Stolt's algorithm (<math>v=0.105\text{ m/ns}</math>)</p> | <p>ReflexW</p> <p>Matlab</p> | <p>(i) The apparatus designed for data acquisition is efficient in large and small retaining walls, being possible acquire data along 30/40 radar lines per hour; (ii) 900 MHz and 1.5 GHz allow mapping several layers of rebar and other structures (e.g. dowels); (iii) the fusion of datasets acquired with antennas with perpendicular orientations (test in the small wall) can significantly reduce the directionality of radar data</p> | <p>(i) The 400 MHz antenna penetration depth the same than the penetration depth obtained with higher frequencies as consequence of the dense rebar; (ii) GPR data is not enough to distinguish between anomalies as consequence of rock anchor and other targets; (iii) not analysed deeper structures and the back wall reflection. More development of algorithms are required</p> | NP                                      | [116] |

|                                                                                                                                                                |                                                                                                                                                                        |                                                                                                                                                                                             |                                                                                                                                                             |                                                                                                                                                                                                                                                                                                                                                                                                                                                                                                                                                                                                                                  |         |                                                                                                                                                                                                                                                                                                                                                                                                                     |                                                                                                                                                                                                                                                                                                                                                                |    |       |
|----------------------------------------------------------------------------------------------------------------------------------------------------------------|------------------------------------------------------------------------------------------------------------------------------------------------------------------------|---------------------------------------------------------------------------------------------------------------------------------------------------------------------------------------------|-------------------------------------------------------------------------------------------------------------------------------------------------------------|----------------------------------------------------------------------------------------------------------------------------------------------------------------------------------------------------------------------------------------------------------------------------------------------------------------------------------------------------------------------------------------------------------------------------------------------------------------------------------------------------------------------------------------------------------------------------------------------------------------------------------|---------|---------------------------------------------------------------------------------------------------------------------------------------------------------------------------------------------------------------------------------------------------------------------------------------------------------------------------------------------------------------------------------------------------------------------|----------------------------------------------------------------------------------------------------------------------------------------------------------------------------------------------------------------------------------------------------------------------------------------------------------------------------------------------------------------|----|-------|
| Study of benefits and limits of innovative processing strategies compared with classical methods. Application in concrete retaining wall with two rebar layers | Two perpendicular 1.5 GHz antennas in the same box<br><br>Time window: 15 ns<br>Samples per trace: 512<br>Traces per meter: 400<br>Transmitter-receiver offset: 0.06 m | Data acquired with a multi-sensor and multi-polarization GPR, along vertical lines using an apparatus designed for the semi-automatic radar data acquisition in walls. Line spacing: 0.01 m | GSSI SIR-20<br><br>Data acquisition apparatus (rail system with an electric motor to move and support the antenna on the vertical wall)<br><br>Survey wheel | <p>A window spectral analysis was applied to the datasets. FFT</p> <p>Classical 2D processing: band-pass filter; time-zero correction; Kirchhoff migration (<math>\epsilon_r=6.25</math>); background removal; Gain</p> <p>Full 3D processing: built 3D datasets from the two antenna polarization separately, after the 2D processing of each B-scan (time shift; dewow; gain; background removal; spiking-deconvolution; F-K filter); 3D migration with a Stolt's algorithm (<math>v=0.105</math> m/ns)</p> <p>Fusion of data from each polarization and inverse scattering followed by data fusion using three strategies</p> | ReflexW | (i) The 2D processing using data from one antenna provides a detailed mapping of the horizontal first layer rebar; (ii) the 3D processing followed by data fusion provides a complete map of both, horizontal and vertical rebar for the top layer of rebar; (iii) the inverse scattering approach followed by data fusion provides a complete map of both, horizontal and vertical rebar of the top layer of rebar | (i) Decay of higher amplitudes (the concrete act as a low pass filter); (ii) the 2D processing using data from one antenna provides a low amplitude and low focus result for the vertical bars; (iii) all three tested processing methods produce a result of lower quality for the second layer of rebar. This result is due to the limits of the GPR dataset | NP | [117] |
|----------------------------------------------------------------------------------------------------------------------------------------------------------------|------------------------------------------------------------------------------------------------------------------------------------------------------------------------|---------------------------------------------------------------------------------------------------------------------------------------------------------------------------------------------|-------------------------------------------------------------------------------------------------------------------------------------------------------------|----------------------------------------------------------------------------------------------------------------------------------------------------------------------------------------------------------------------------------------------------------------------------------------------------------------------------------------------------------------------------------------------------------------------------------------------------------------------------------------------------------------------------------------------------------------------------------------------------------------------------------|---------|---------------------------------------------------------------------------------------------------------------------------------------------------------------------------------------------------------------------------------------------------------------------------------------------------------------------------------------------------------------------------------------------------------------------|----------------------------------------------------------------------------------------------------------------------------------------------------------------------------------------------------------------------------------------------------------------------------------------------------------------------------------------------------------------|----|-------|

|                                                                                                                                             |                                                                                           |                                                      |                                                           |                                                                                                                                                                                                                                                      |                            |                                                                                                                                                                                                    |                                                                                                                                                                                                                                                                                                                                                                                                                                                                                                              |                                      |       |
|---------------------------------------------------------------------------------------------------------------------------------------------|-------------------------------------------------------------------------------------------|------------------------------------------------------|-----------------------------------------------------------|------------------------------------------------------------------------------------------------------------------------------------------------------------------------------------------------------------------------------------------------------|----------------------------|----------------------------------------------------------------------------------------------------------------------------------------------------------------------------------------------------|--------------------------------------------------------------------------------------------------------------------------------------------------------------------------------------------------------------------------------------------------------------------------------------------------------------------------------------------------------------------------------------------------------------------------------------------------------------------------------------------------------------|--------------------------------------|-------|
| Assessment of a crushed stone and lime mortar retaining wall in order to determine the shape, stability and foundations                     | Shielded antenna with a dual frequency operation (200 MHz and 600 MHz) and 80 MHz antenna | 3 Horizontal radar lines on the wall and on the bank | RIS Hi-MOD and RIS ONE GPR (IDS)<br><br>Survey wheel      | Time-zero correction; background removal; vertical band-pass filter (for the 80 MHz antenna: from 50 to 150 MHz; for the 200 MHz antenna: from 100 to 300 MHz; for the 600 MHz antenna: from 400 to 800 MHz); Linear gain; Smoothed gain             | GRED 30 Utilities software | (i) The thickness of the wall was determined; (ii) detection of the level of bedrock behind the wall; (iii) anomalies produced by the anchors installed during previous repairing works            | (i) Accuracy depends on the selection of radar-waves velocities                                                                                                                                                                                                                                                                                                                                                                                                                                              | NP                                   | [118] |
| Analysis of a retaining wall built in an unknown ground. The objective is to determine the geometry of the masonry wall and its foundations | Dual frequency of 200/600 MHz antenna<br><br>80 MHz antenna                               | Three longitudinal and three transverse scans        | RIS Hi-MOD and RIS ONE (IDS)                              | Time-zero correction; background removal; vertical band-pass filter (80 MHz antenna: from 50 to 150 MHz; 200 MHz antenna: from 100 to 300 MHz; 600 MHz antenna: from 400 to 800 MHz); Linear gain; Smoothed gain                                     | GRED 30 Utilities software | (i) Detection of several geological layers under the wall; (ii) detection of the foundations; (iii) determined thickness and height from radar data; (iv) anomalies associated to possible anchors | NP                                                                                                                                                                                                                                                                                                                                                                                                                                                                                                           | Tests excavations                    | [119] |
| Assessment of a masonry (stone blocks) wall                                                                                                 | 1 GHz antenna: 2 cm trace-interval with 40 ns time window and 1024 samples per trace      | Radar lines along the top of the wall                | RAMAC/GPR system from MALÅ Geoscience<br><br>Survey wheel | Time-zero correction; 2 Dewow; Gain function (linear 0.47 & exponential 0.47); Subtracting average (450 average traces); Band-pass Butterworth (low cut-off: 300 MHz n & upper cut-off: 1500 MHz); Kirchhoff migration based on velocity = 0.14 m/ns | Reflex W                   | (i) Metrical analysis of masonry ashlar<br>(ii) Identification of edges of blocks and layers of blocks                                                                                             | (i) The confluence of many diffractions made difficult the identification of the true ashlar edges in the horizontal direction; (ii) irregularities in the geometry could produce inaccuracies in the spatial trace positioning; (iii) the data showed complex pattern of reflections such as multiple reflections and hyperbolic diffractions that makes difficult the interpretation of the data; (iv) careful filtering of raw data is required to diminish clutter and improve the signal-to-noise ratio | FDTD modelling<br><br>Laser scanning | [120] |

|                                                       |                                                               |                                                                                                                        |    |                                                                                                                       |          |                                                                                                                                                                                                                                           |                                                                                                                                                                                                                                                                                                                                                                          |    |       |
|-------------------------------------------------------|---------------------------------------------------------------|------------------------------------------------------------------------------------------------------------------------|----|-----------------------------------------------------------------------------------------------------------------------|----------|-------------------------------------------------------------------------------------------------------------------------------------------------------------------------------------------------------------------------------------------|--------------------------------------------------------------------------------------------------------------------------------------------------------------------------------------------------------------------------------------------------------------------------------------------------------------------------------------------------------------------------|----|-------|
| Study of stone retaining walls in a subterranean tomb | 500 MHz antenna (time window: 40 ns)                          | Corridor: horizontal radar lines (10 cm between lines)<br><br>Walls inside the tomb: circular and parallel radar lines | NP | Background removal; band-pass filter between 400 MHz and 1200 MHz; manual gain; built 3D circular pseudo-radar images | GPRSlice | (i) Identification of the two layers of irregular stones of the walls and the thickness of each layer; (ii) detection of the contact with the natural soil; (iii) detection of zones affected by humidity and salt (comparing amplitudes) | (i) The irregular structure makes difficult the identification of specific damage; (ii) required the use of scaffolding due to the height and shape; (iii) the irregular surface makes difficult the survey and covering the stones with a polyurethane sheet was required. It was difficult to draw and follow regular radar lines (a laser was used to mark the lines) | NP | [121] |
|                                                       | 800 MHz antenna (time window: 45 ns and 512 samples per scan) |                                                                                                                        |    |                                                                                                                       |          |                                                                                                                                                                                                                                           |                                                                                                                                                                                                                                                                                                                                                                          |    |       |
|                                                       | 1 GHz antenna                                                 |                                                                                                                        |    |                                                                                                                       |          |                                                                                                                                                                                                                                           |                                                                                                                                                                                                                                                                                                                                                                          |    |       |
|                                                       | 2.3 GHz antenna                                               |                                                                                                                        |    |                                                                                                                       |          |                                                                                                                                                                                                                                           |                                                                                                                                                                                                                                                                                                                                                                          |    |       |

Table S4. Retaining walls: relevant on-site GPR surveys (NP = Not Provided; Ref. = Reference).
