# Supplementary material
Source: MDPI journal article supplement (https://www.mdpi.com/2072-4292/13/4/672)
Supplement: s1 [file s1 › Table S6. Tunnelling_relevant on-site GPR surveys.pdf]

| GPR Application                                                                                                                                            | Methodology                                                        |                                                                                                                                                          |                                                                                                              | Processing                                                                                                                                                                             |          | Results                                                                                                                                                                                                                                                                                                                                                             |                                                                                                                                                                                                                                                                                                                                                                                                                                                                                   | Complementary Tests (NDT, coring, etc.) | Ref.  |
|------------------------------------------------------------------------------------------------------------------------------------------------------------|--------------------------------------------------------------------|----------------------------------------------------------------------------------------------------------------------------------------------------------|--------------------------------------------------------------------------------------------------------------|----------------------------------------------------------------------------------------------------------------------------------------------------------------------------------------|----------|---------------------------------------------------------------------------------------------------------------------------------------------------------------------------------------------------------------------------------------------------------------------------------------------------------------------------------------------------------------------|-----------------------------------------------------------------------------------------------------------------------------------------------------------------------------------------------------------------------------------------------------------------------------------------------------------------------------------------------------------------------------------------------------------------------------------------------------------------------------------|-----------------------------------------|-------|
|                                                                                                                                                            | Antennas & Acquisition parameters                                  | Testing Set-up                                                                                                                                           | Equipment                                                                                                    | Filters & Algorithms                                                                                                                                                                   | Software | Achievements                                                                                                                                                                                                                                                                                                                                                        | Inconveniences & Limits                                                                                                                                                                                                                                                                                                                                                                                                                                                           |                                         |       |
| [Fired tunnel walls]<br><br>To estimate the depth of damaged concrete and provide information on the fault extension                                       | 900 MHz: time length of 20 ns<br><br>1.5 GHz: time length of 15 ns | Three longitudinal profile lines in three zones with different levels of damage                                                                          | GSSI model SIR-10H                                                                                           | 900 MHz: average of 4 traces, low-cut filter at 250 MHz and high-cut filter at 1800 MHz<br><br>1.5 GHz: average of 4 traces, low-cut filter at 400 MHz and high-cut filter at 4000 MHz | NP       | (i) It can be stated that most of the concrete is heterogeneous (with a large number of cracks) and that different layers exist, which is most certainly caused by the heat from the fire; (ii) thickness estimation; (iii) higher signal amplitude values due to water intrusion bleeding through the wall and by the filling of all cracks and micro-delamination | NP                                                                                                                                                                                                                                                                                                                                                                                                                                                                                | Seismic refraction method               | [186] |
| [Bored Tunnel]<br>[Water Supply Tunnel - concrete lined circular tunnel]<br><br>To map tunnel lining condition and locate concrete deterioration and voids | 1 GHz: 30 ns time window and 5 cm sampling interval                | Tunnel surveyed in both directions<br><br>A modular wooden push cart was designed with a counter-balanced antenna support arm mounted on a rotating head | Sensors and Software Noggin Conquest<br><br>Odometer wheel attached to the antenna to trigger radar readings | Time-zero correction; Dewow; SEC gain; Background subtraction; 2D migration                                                                                                            | NP       | (i) concrete liner thickness; (ii) presence of reinforcement and delineated zones where mesh roof supports and construction support timbers are embedded in the liner; (iii) locations and orientations of faults that intersect the tunnel; (iv) minor voids; (v) honeycomb sections; (vi) areas of rock-liner separation                                          | (i) Radar responses to voids, slight liner-rock separation, hollows under liner, and embedded wood, had slightly different characters, but were not always uniquely distinguishable from each other; (ii) a 1 cm reading interval and 40 ns time window was found to create unmanageable data volumes and problems with data integrity; (iii) distance errors were attributed to roughness of the concrete ceiling of the tunnel affecting the small measure wheel on the antenna | NP                                      | [188] |

|                                                                         |                                                                                                                                                           |                                                                                                                                                    |               |                                     |                                                                |                                                                                                   |                                                                                                                                                                                                                                                                                                                                                                                                                                                        |                          |       |
|-------------------------------------------------------------------------|-----------------------------------------------------------------------------------------------------------------------------------------------------------|----------------------------------------------------------------------------------------------------------------------------------------------------|---------------|-------------------------------------|----------------------------------------------------------------|---------------------------------------------------------------------------------------------------|--------------------------------------------------------------------------------------------------------------------------------------------------------------------------------------------------------------------------------------------------------------------------------------------------------------------------------------------------------------------------------------------------------------------------------------------------------|--------------------------|-------|
| [Shield tunnel]                                                         | 250 MHz: step length of 2.5 cm, 75 ns time window and 188 samples                                                                                         | Longitudinal profile lines (along the axis direction of the tunnel)                                                                                | Noggin GPR    | Gain                                | MATLAB (500 MHz and 1 GHz data) and PIPEGPR 2.3 (250 MHz data) | (i) Steel bars in segment; (ii) thicknesses of segment layer; (iii) thicknesses of grouting layer | (i) There are so much noise signals from utilities such as power cables in the tunnel, which can difficult to detect grouting; (ii) slower speed of collecting data provides better GPR imaging resolution, while the real time detection needs faster data collection and a whole cross section scanning. Thus, future research is going to develop other GPR facilities for the higher speed data collection and the complete cross section scanning | FDTD numerical modelling | [189] |
| To detect the grout thickness behind the lining segments of metro lines | 500 MHz: step length of 2 cm, 50 ns time window and 250 samples                                                                                           |                                                                                                                                                    |               |                                     |                                                                |                                                                                                   |                                                                                                                                                                                                                                                                                                                                                                                                                                                        |                          |       |
|                                                                         | 1 GHz: step length of 1 cm, 24 ns time window and 241 samples                                                                                             |                                                                                                                                                    |               |                                     |                                                                |                                                                                                   |                                                                                                                                                                                                                                                                                                                                                                                                                                                        |                          |       |
| [Cast-in-situ reinforced concrete structure]                            | 900 MHz (Ground-coupled antenna): time window of 25 ns (maximum depth of 800 mm), scanning frequency of 64 Hz and sampling rate of 512 samples per second | Three profile lines located at the vault and left and right shoulders (along the axis direction of the tunnel) with an average line spacing of 1 m | GSSI SIR-3000 | Algorithm for automatic recognition | NP                                                             | (i) Automatic recognition of second lining layer and thickness                                    | NP                                                                                                                                                                                                                                                                                                                                                                                                                                                     | NP                       | [190] |

|                                                                                                                                                                                               |                                                                                                                          |                                                                                      |                                                                   |                                                                                                                                                         |                                 |                                                                                                                                                                                |                                                                                                                                                                                                                                                                                                                                                                         |                          |       |
|-----------------------------------------------------------------------------------------------------------------------------------------------------------------------------------------------|--------------------------------------------------------------------------------------------------------------------------|--------------------------------------------------------------------------------------|-------------------------------------------------------------------|---------------------------------------------------------------------------------------------------------------------------------------------------------|---------------------------------|--------------------------------------------------------------------------------------------------------------------------------------------------------------------------------|-------------------------------------------------------------------------------------------------------------------------------------------------------------------------------------------------------------------------------------------------------------------------------------------------------------------------------------------------------------------------|--------------------------|-------|
| To perform a condition assessment aiming to locate the rebar, estimate the thickness of the second lining, and determine the presence and distribution of any damage for an annual inspection | 500 MHz<br>(Ground-coupled antenna): 2 cm of trace-interval and 40 ns time window composed of 512 samples per trace      | Three longitudinal testing lines set against the left haunch, right haunch and vault | RAMAC GPR system from MALA Geoscience                             | Time-zero correction; Subtract-DC; Band-pass (Butterworth); Manual gain<br><br>Automatic rebar location: a symmetry-based algorithm and hyperbola match | NP                              | (i) total rebar number (with some missing rebar areas); (ii) first-second lining interface (thickness estimation); (iii) damages (cracks/fractures) spanning the entire tunnel | NP                                                                                                                                                                                                                                                                                                                                                                      | FDTD numerical modelling | [195] |
| [Shield tunnel]<br><br>To estimate the thickness of the grouting layer and to determine the presence and distribution of any damage                                                           | 800 MHz<br>(Ground-coupled antenna): Sampling rate of 50 scans/s and 40 ns time window composed of 512 samples per trace | Two horizontal/longitudinal testing lines and two vertical lines                     | RAMAC GPR system from MALA Geoscience                             | Time-zero correction; Energy decay; Subtracting average; Band-pass (Butterworth); Running average                                                       | NP                              | (i) Estimation of the segment and grouting layers thicknesses; (ii) defects in the grouting layer such as low density, voids, cracks or fissures                               | (i) The existence of the rebar in the segment could affect the detection of damage                                                                                                                                                                                                                                                                                      | FDTD numerical modelling | [196] |
| [Bored Tunnel]<br><br>To locate rebar, check second lining thickness and the existence of any karst conduit or significant rock fractures beneath the tunnel                                  | 200 MHz, 600 MHz and 2 GHz                                                                                               | Grid lines at intervals of 10 cm                                                     | The TR-HF (2 GHz) and RIS MF<br><br>Hi-Mod (200–600 MHz) antennas | NP                                                                                                                                                      | IDS GRED data analysis software | (i) Rebar location and depth estimation; (ii) existence of gaps in lining; (iii) detection of incomplete grouting; (iv) presence of karst conduits and voids                   | (i) If the intervals between readings are excessive, the data acquired will be insufficient to provide a clear overview of the sub-structures; (ii) complications in interpreting and analysing the data (e.g. effects of near-filed antenna coupling or induction effects, oscillations in antenna radiation patterns, inhomogeneous, anisotropic and loose materials) | NP                       | [201] |

|                                                                                                                            |                                                                                                                                                                             |                                                                                                                                                        |                                                                                                  |                                                                                                                           |                                                                                       |                                                                                                                                                                                                                                             |                                                                                                                                                                                                                                                                                                                                                                                                                        |    |                |
|----------------------------------------------------------------------------------------------------------------------------|-----------------------------------------------------------------------------------------------------------------------------------------------------------------------------|--------------------------------------------------------------------------------------------------------------------------------------------------------|--------------------------------------------------------------------------------------------------|---------------------------------------------------------------------------------------------------------------------------|---------------------------------------------------------------------------------------|---------------------------------------------------------------------------------------------------------------------------------------------------------------------------------------------------------------------------------------------|------------------------------------------------------------------------------------------------------------------------------------------------------------------------------------------------------------------------------------------------------------------------------------------------------------------------------------------------------------------------------------------------------------------------|----|----------------|
| [Railway tunnel]<br><br>A train-mounted GPR system for tunnel health assessment at the normal operating speed of the train | 300 MHz (air-launched; horn antenna): scanning rate of 976 scans/sec., sampling point interval of 5 cm (maximum speed of 175 km/h), 60 ns time window and 512 samples/trace | Six channels/sets of antennas fixed on the train (six profile lines)                                                                                   | NP<br><br>GPS/GIS                                                                                | DC-level correction; Removing background; Vertical filtering; Horizontal filtering; Automatic Gain Control; Gain function | Multi-channel processing software (the data from the six channels displayed together) | (i) Steel arch on the lining surface; (ii) shotcrete reinforcement; (iii) thickness of the lining; (iv) rock disturbance behind the lining; (v) water seepage of vault                                                                      | (i) Air-launched antennas can be mounted on a vehicle with a certain distance to the wall. However, due to the diffusion attenuation, some energy is lost in the air and the probing depth is shallower than ground-coupled antennas                                                                                                                                                                                   | NP | [197]<br>[206] |
| [Immersed tube tunnel]<br><br>Establishing the design configuration of at several immersion joint locations                | 900 MHz and 2 GHz                                                                                                                                                           | Survey performed by manoeuvring the antenna over the surface (roof) of the tunnel in a grid pattern 40 cm spacing (longitudinal and transversal scans) | RIS MF Hi-Mod multi-frequency System and hand-held RIS FastWave GPR system, TR-HF (IDS Georadar) | Rubber-band interpolation; Time-zero correction; Band-pass; Background removal; Smoothed gain                             | IDS GRED HD3 software                                                                 | (i) Identification of the position and depth of the Omega Seals (immersion joint); (ii) two layers of rebar; (iii) rebar spacing of the concrete cover; (iv) thickness of shotcrete; (v) thickness of Rockwool Rollabats layer (insulation) | (i) No odometer was used to prevent difficulties caused by wheel slippage. These might have been caused by a layer of consolidated dirt/dust/particles covering the tunnel ceiling, which made it slippery to work on; (ii) although the depth of the GPR penetration has been blocked to a large extent by the presence of two layers of rebar, it was possible to penetrate at a depth of up to 200 cm approximately | NP | [207]<br>[208] |

Table S6. Tunnelling: relevant on-site GPR surveys (NP = Not Provided; Ref. = Reference).
